# Supplementary material for: Comparative life cycle assessment of NAD(P)H regeneration technologies
Source: Royal Society of Chemistry journal article supplement (doi:10.1039/d1gc02349g), 2021-01-01
Supplement: d1gc02349g1.pdf [file d1gc02349g1.pdf]

## SUPPLEMENTARY INFORMATION

### **Comparative Life Cycle Assessment of NAD(P)H Regeneration Technologies**

Joseph W.H. Burnett,<sup>a,b</sup> Ziyang Sun,<sup>c</sup> Jianwei Li,<sup>a</sup> Xiaonan Wang<sup>\*,c</sup>  
and Xiaodong Wang<sup>\*,a</sup>

<sup>a</sup>Chemical Engineering, Department of Engineering, Lancaster University,  
Lancaster LA1 4YW, United Kingdom

<sup>b</sup>Chemical and Materials Engineering, School of Engineering, University of  
Aberdeen, Aberdeen AB24 3UE, United Kingdom

<sup>c</sup>Department of Chemical and Biomolecular Engineering, National University of  
Singapore, Singapore 117585, Singapore

\*Corresponding Author E-mails:

chewxia@nus.edu.sg (Xiaonan Wang)

xiaodong.wang@lancaster.ac.uk (Xiaodong Wang)

Supplementary information consists of 7 Figures and 6 Tables.

### Biocatalytic NADH Regeneration (Bio)

This system involved the use of a carbon nanotube-lined quartz column to immobilise hydrogenase, NAD<sup>+</sup> reductase and L-alanine dehydrogenase. A H<sub>2</sub>-saturated solution of NAD<sup>+</sup>, pyruvate and ammonium chloride was flowed over the immobilised enzymes, resulting in the production of alanine with concurrent NADH regeneration. Hydrogenase was used to convert H<sub>2</sub> to protons and electrons, whereby the protons and electrons formed are then used by NAD<sup>+</sup> reductase to reduce NAD<sup>+</sup> to NADH. L-alanine dehydrogenase was used as the production enzyme to convert pyruvate to L-alanine using NADH. When data for some materials (e.g., ferrocene) was not available, the data for the constituent components (i.e., iron and cyclopentadiene) were included instead.

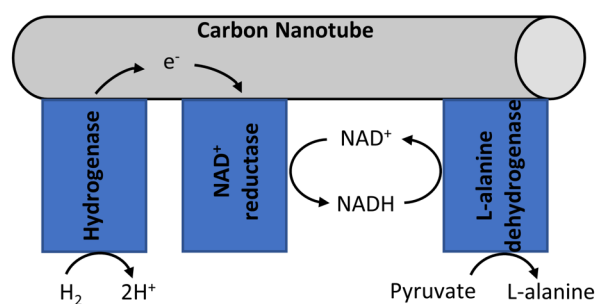

Figure S1: Schematic representation of Bio.

Table S1: Material inputs for Bio.

| Material                   | Mass (kg) |
|----------------------------|-----------|
| Ammonium chloride          | 6.00E-07  |
| Bis Tris buffer            | 1.06E-05  |
| Cyclopentadiene            | 2.59E-04  |
| Hydrogenase                | 1.20E-07  |
| Hydrogen                   | 3.24E-06  |
| Iron                       | 1.12E-04  |
| Lactic acid                | 8.40E-08  |
| L-Alanine dehydrogenase    | 3.00E-07  |
| NAD <sup>+</sup>           | 4.98E-08  |
| NAD <sup>+</sup> reductase | 4.80E-08  |
| Sodium formate             | 9.98E-08  |
| Toluene                    | 7.41E-03  |
| Water                      | 1.50E-03  |

### Homogeneous Catalytic NADH Regeneration (Homo)

An organometallic Rh complex was used to regenerate NADH from NAD<sup>+</sup>, utilising sodium formate as the hydrogen source. Horse liver alcohol dehydrogenase (HLADH) was then used to convert 4-phenylbutan-2-one to the corresponding alcohol. Again, when the data of the niche ligands was unavailable, the data for the constituent components were used instead.

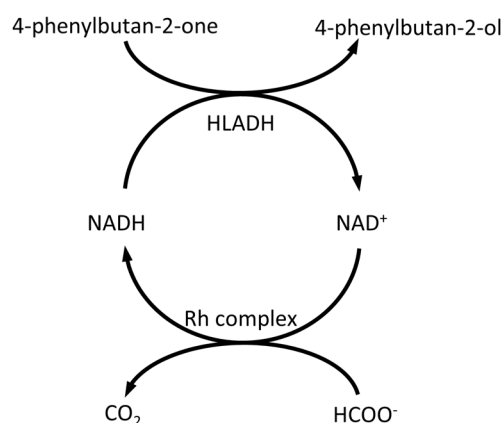

Figure S2: Schematic representation of Homo.

Table S2: Material inputs for Homo.

| Material                          | Mass (kg) |
|-----------------------------------|-----------|
| Benzylacetone                     | 2.06E-06  |
| Bromine                           | 3.60E-08  |
| Butene                            | 1.26E-08  |
| Cyclopentadiene                   | 6.75E-08  |
| Dichloromethane                   | 6.78E-05  |
| Ethyl acetate                     | 1.99E-08  |
| Horse liver alcohol dehydrogenase | 2.60E-06  |
| NAD <sup>+</sup>                  | 6.64E-07  |
| Phenanthroline                    | 9.20E-08  |
| Phosphoric acid                   | 9.80E-06  |
| Potassium carbonate               | 1.38E-05  |
| Rhodium                           | 5.15E-08  |
| Sodium formate                    | 8.40E-06  |
| Water                             | 1.00E-03  |

### Electrocatalytic NADH Regeneration (Electro)

A cholesterol-modified gold amalgam electrode was used as the regeneration system, and this was coupled to the enzymatic reduction of pyruvate to D-lactate via D-lactate dehydrogenase (LDH).

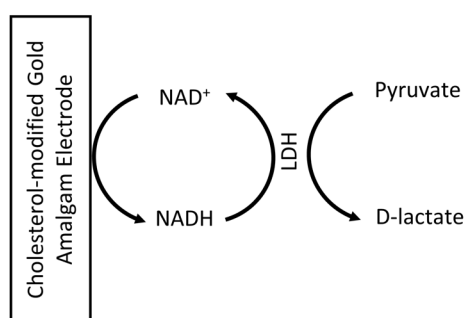

Figure S3: Schematic representation of Electro.

Table S3: Material inputs for Electro.

| Material                | Mass (kg) |
|-------------------------|-----------|
| Cholesteryl oleate      | 4.52E-06  |
| D-Lactate dehydrogenase | 3.00E-06  |
| Gold                    | 6.95E-03  |
| Hexane                  | 1.50E-05  |
| Lactic acid             | 1.14E-04  |
| Mercury                 | 1.36E-02  |
| NAD <sup>+</sup>        | 4.14E-07  |
| Phosphoric acid         | 2.45E-03  |
| Potassium carbonate     | 3.46E-03  |
| Sodium formate          | 9.97E-05  |
| Water                   | 1.00E-01  |

### Photocatalytic NADH Regeneration (Photo)

A two-dimensional isotype heterojunction photocatalyst, named quantum dots@flake graphitic carbon nitride, was used to regenerate NADH under visible light irradiation. Using triethanolamine as a sacrificial electron donor, the regeneration system was coupled to the enzymatic reduction of formaldehyde to methanol via yeast alcohol dehydrogenase (YADH).

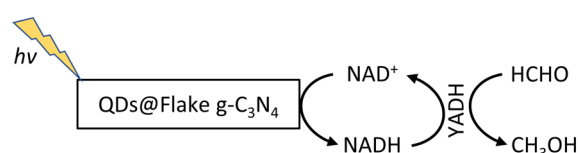

Figure S4: Schematic representation of Photo.

Table S4: Material inputs for Photo.

| Material                    | Mass (kg) |
|-----------------------------|-----------|
| NAD <sup>+</sup>            | 2.66E-04  |
| Methanal                    | 7.20E-06  |
| Melamine                    | 1.32E-05  |
| Phosphoric acid             | 1.96E-04  |
| Potassium carbonate         | 2.76E-04  |
| Triethanolamine             | 2.26E-03  |
| Urea                        | 3.30E-05  |
| Water                       | 2.00E-02  |
| Yeast alcohol dehydrogenase | 2.00E-06  |

## Heterogeneous Catalytic NADH Regeneration (Hetero)

A platinum supported on aluminium oxide catalyst was used in the presence of hydrogen to reduce  $\text{NAD}^+$  to NADH. The regeneration system was then coupled to the enzymatic reduction of propanal to propanol via alcohol dehydrogenase.

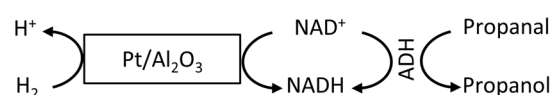

Figure S5: Schematic representation of Hetero.

Table S5: Material inputs for Hetero.

| Material              | Mass (kg) |
|-----------------------|-----------|
| Alcohol dehydrogenase | 1.00E-06  |
| Aluminium oxide       | 2.48E-05  |
| Hydrochloric acid     | 2.70E-07  |
| Hydrogen              | 5.85E-03  |
| NAD <sup>+</sup>      | 2.50E-04  |
| Nitric acid           | 3.20E-07  |
| Nitrogen              | 1.13E-03  |
| Phosphoric acid       | 4.12E-04  |
| Platinum              | 2.50E-07  |
| Potassium carbonate   | 2.90E-04  |
| Propanal              | 2.90E-05  |
| Water                 | 7.50E-02  |

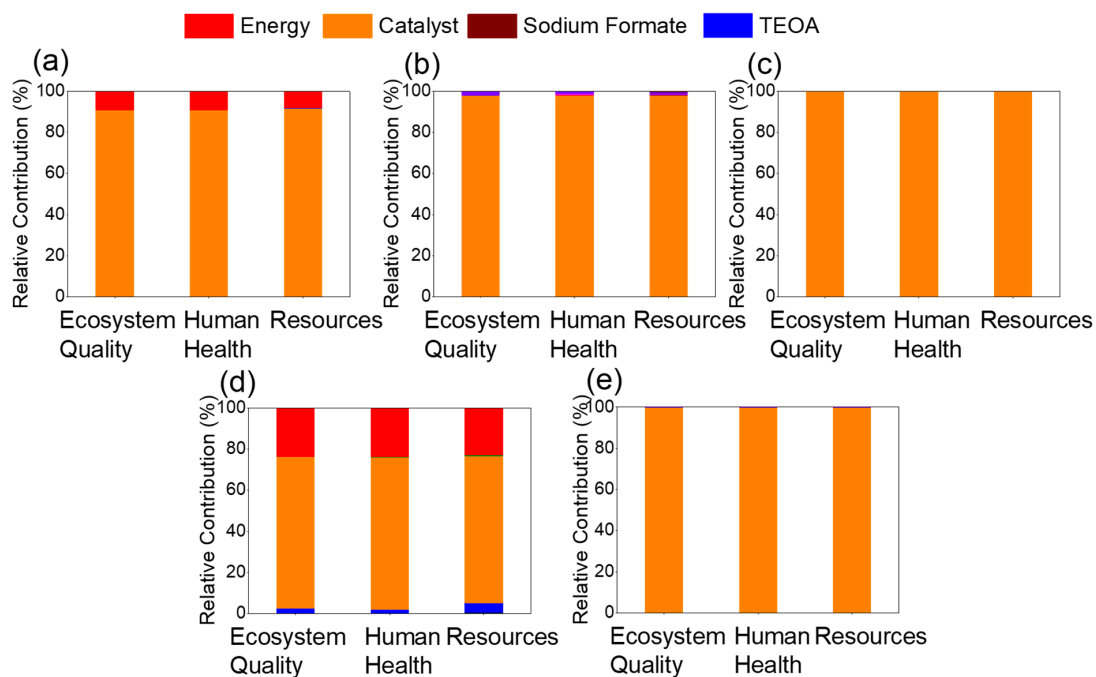

Figure S6: Characterisation results of the impacts to the ReCiPe endpoint categories for the entire reaction for (a) Bio (b) Homo (c) Electro (d) Photo and (e) Hetero.

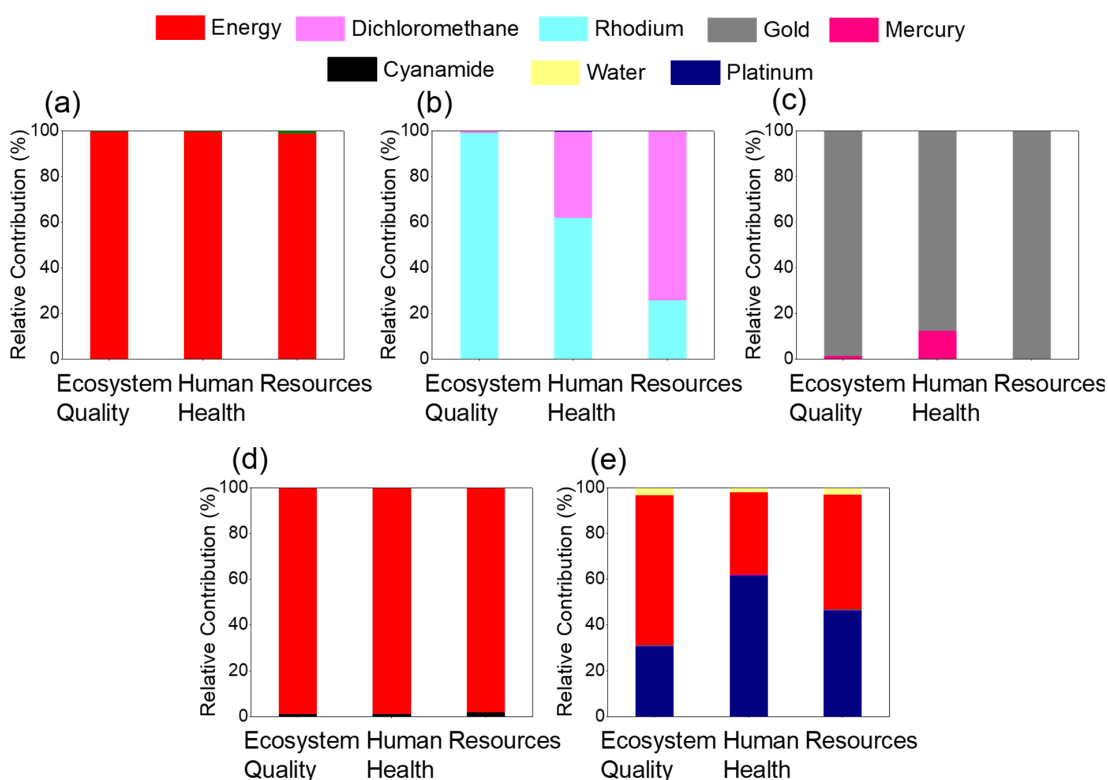

Figure S7: Characterisation results of the impacts to the ReCiPe endpoint categories for the synthesis of the catalysts in (a) Bio (b) Homo (c) Electro (d) Photo and (e) Hetero.

Table S6: Life cycle inventory data of chemicals, grouped into metals, enzymes, chemicals required for catalyst synthesis and chemicals required in the reaction, respectively.

| Chemical                | ALOP<br>(m2a) | GWP100<br>(kg CO <sub>2</sub> -eq) | FDP<br>(kg oil-eq) | FETPinf<br>(kg 1,4-DCB-eq) | HETPinf<br>(kg-P-eq) | IRP_HE<br>(kg-U-eq) | METPinf<br>(kg 1,4-DCB-eq) | MDP<br>(kg-Fe-eq) | TAP100<br>(kg-SO <sub>2</sub> -eq) | ULOP<br>(m2a) |
|-------------------------|---------------|------------------------------------|--------------------|----------------------------|----------------------|---------------------|----------------------------|-------------------|------------------------------------|---------------|
| Platinum                | 515.81        | 26835                              | 8666.8             | 3289.6                     | 130360               | 1431.8              | 3013.5                     | 134350            | 2138                               | 559.17        |
| Gold                    | 543.79        | 15486                              | 4851               | 16827                      | 851000               | 1678                | 15493                      | 75839             | 161.4                              | 2860          |
| Rhodium                 | 3988.3        | 83934                              | 29005              | 24858                      | 312800               | 4984                | 21513                      | 141130            | 3263                               | 900880        |
| Iron                    | 0.0972        | 0.8332                             | 0.2315             | 0.10873                    | 0.70707              | 0.09458             | 0.09664                    | 0.26424           | 0.004647                           | 0.35253       |
| Mercury                 | 1.2795        | 12.268                             | 2.0612             | 0.5067                     | 66839                | 0.1639              | 76.54                      | 0.06488           | 0.07686                            | 0.10054       |
| ADH                     | 5.6793        | 7.0334                             | 1.9397             | 0.12071                    | 3.8434               | 1.6366              | 0.11079                    | 0.47822           | 0.053722                           | 0.086694      |
| D-Lactate dehydrogenase | 5.6793        | 7.0334                             | 1.9397             | 0.12071                    | 3.8434               | 1.6366              | 0.11079                    | 0.47822           | 0.05372                            | 0.086694      |
| HLADH                   | 5.6793        | 7.0334                             | 1.9397             | 0.12071                    | 3.8434               | 1.6366              | 0.11079                    | 0.47822           | 0.05372                            | 0.086694      |
| Hydrogenase             | 5.6793        | 7.0334                             | 1.9397             | 0.12071                    | 3.8434               | 1.6366              | 0.11079                    | 0.47822           | 0.05372                            | 0.086694      |
| L-Alanine dehydrogenase | 5.6793        | 7.0334                             | 1.9397             | 0.12071                    | 3.8434               | 1.6366              | 0.11079                    | 0.47822           | 0.05372                            | 0.086694      |
| NAD reductase           | 5.6793        | 7.0334                             | 1.9397             | 0.12071                    | 3.8434               | 1.6366              | 0.11079                    | 0.47822           | 0.05372                            | 0.086694      |
| YADH                    | 5.6793        | 7.0334                             | 1.9397             | 0.12071                    | 3.8434               | 1.6366              | 0.11079                    | 0.47822           | 0.05372                            | 0.086694      |
| Aluminium oxide         | 0.021902      | 1.6379                             | 0.40847            | 0.25392                    | 1.1125               | 0.04864             | 0.22462                    | 0.066963          | 0.01229                            | 0.017829      |
| Bromine                 | 0.09697       | 5.217                              | 1.7034             | 0.0331                     | 1.21                 | 0.2661              | 0.03149                    | 0.10796           | 0.01674                            | 0.02289       |
| Butene                  | 0.00015       | 1.534                              | 1.532              | 0.00091                    | 0.0134               | 0.000266            | 0.000718                   | 0.000761          | 0.00355                            | 0.00017       |
| Cholesteryl oleate      | 0.029055      | 1.8225                             | 1.428              | 0.013956                   | 0.46307              | 0.078935            | 0.012196                   | 0.057448          | 0.0066758                          | 0.010604      |
| Cyclopentadiene         | 0.029055      | 1.8225                             | 1.428              | 0.013956                   | 0.46307              | 0.078935            | 0.012196                   | 0.057448          | 0.0066758                          | 0.010604      |
| Benzylacetone           | 0.029055      | 1.8225                             | 1.428              | 0.013956                   | 0.46307              | 0.078935            | 0.012196                   | 0.057448          | 0.0066758                          | 0.010604      |
| Dichloromethane         | 0.029055      | 1.8225                             | 1.428              | 0.013956                   | 0.46307              | 0.078935            | 0.012196                   | 0.057448          | 0.0066758                          | 0.010604      |
| Ethyl acetate           | 0.1326        | 2.586                              | 1.643              | 0.0281                     | 1.0289               | 0.2006              | 0.0253                     | 0.1492            | 0.01123                            | 0.02298       |



|                   |          |         |          |           |         |          |           |           |           |           |
|-------------------|----------|---------|----------|-----------|---------|----------|-----------|-----------|-----------|-----------|
| Hexane            | 0.03225  | 0.611   | 1.029    | 0.0072    | 0.2708  | 0.1891   | 0.0065    | 0.0499    | 0.00465   | 0.00775   |
| Hydrochloric acid | 0.07147  | 0.60894 | 0.22036  | 0.015431  | 0.78867 | 0.2121   | 0.018028  | 0.078801  | 0.0045491 | 0.0080401 |
| Hydrogen          | 0.041481 | 2.0365  | 1.7434   | 0.010772  | 0.40072 | 0.17319  | 0.010225  | 0.035178  | 0.0055089 | 0.0045418 |
| Melamine          | 0.117    | 5.11    | 2.166    | 0.0484    | 1.8945  | 0.3048   | 0.04706   | 0.33614   | 0.0333    | 0.0321    |
| Nitric acid       | 0.024872 | 3.1583  | 0.3019   | 0.010073  | 0.45323 | 0.049194 | 0.010692  | 0.20324   | 0.013128  | 0.0049027 |
| Nitrogen          | 0.025162 | 0.24517 | 0.069994 | 0.0056092 | 0.17735 | 0.14007  | 0.0052849 | 0.0043299 | 0.0014656 | 0.0016603 |
| Phenanthroline    | 0.029055 | 1.8225  | 1.428    | 0.013956  | 0.46307 | 0.078935 | 0.012196  | 0.057448  | 0.0066758 | 0.010604  |
| Toluene           | 0.001243 | 1.5461  | 1.5826   | 0.00143   | 0.02227 | 0.00395  | 0.001512  | 0.003005  | 0.003817  | 0.008485  |
| Urea              | 0.06656  | 3.2979  | 1.4398   | 0.02816   | 1.1186  | 0.17526  | 0.02745   | 0.0202    | 0.019299  | 0.07781   |
|                   |          |         |          |           |         |          |           |           |           |           |
| Ammonium chloride | 0.0522   | 1.2961  | 0.44502  | 0.01832   | 0.71506 | 0.11137  | 0.01798   | 0.12143   | 0.00615   | 0.014202  |
| BIS TRIS buffer   | 0.067021 | 2.812   | 1.6863   | 0.025028  | 0.89882 | 0.22753  | 0.023767  | 0.11726   | 0.0096172 | 0.014492  |
| Lactic acid       | 0.12164  | 4.171   | 1.897    | 0.044429  | 1.5245  | 0.26898  | 0.039392  | 0.20187   | 0.016144  | 0.025787  |
| Mathanal          | 0.0192   | 0.9652  | 0.9177   | 0.0159    | 0.4254  | 0.0411   | 0.0107    | 0.07869   | 0.0035    | 0.00943   |
| Propanal          | 0.38844  | 2.841   | 1.8173   | 0.029402  | 1.1488  | 0.52036  | 0.028395  | 0.096937  | 0.013937  | 0.018508  |
| Sodium formate    | 0.0838   | 2.2256  | 0.97711  | 0.0354    | 1.213   | 0.3698   | 0.03323   | 0.13472   | 0.010544  | 0.02445   |
| TEOA              | 0.067    | 2.812   | 1.686    | 0.025     | 0.8988  | 0.2275   | 0.02377   | 0.11726   | 0.00962   | 0.0145    |
| NAD <sup>+</sup>  | 0.029055 | 1.8225  | 1.428    | 0.013956  | 0.46307 | 0.078935 | 0.012196  | 0.057448  | 0.0066758 | 0.010604  |
| Water             | 3.75E-05 | 0.0015  | 0.00044  | 2.26E-05  | 0.0008  | 0.00015  | 2.19E-05  | 0.00012   | 6.67E-06  | 1.54E-05  |

(Table S6 continued)
